# Supplementary material for: New Oxidovanadium(IV) Coordination Complex Containing 2-Methylnitrilotriacetate Ligands Induces Cell Cycle Arrest and Autophagy in Human Pancreatic Ductal Adenocarcinoma Cell Lines
Source: PubMed Central journal article supplement (PMC6358955; doi:10.3390/ijms20020261), 2019-01-10
Supplement: ijms-20-00261-s001.pdf [file ijms-20-00261-s001.pdf]

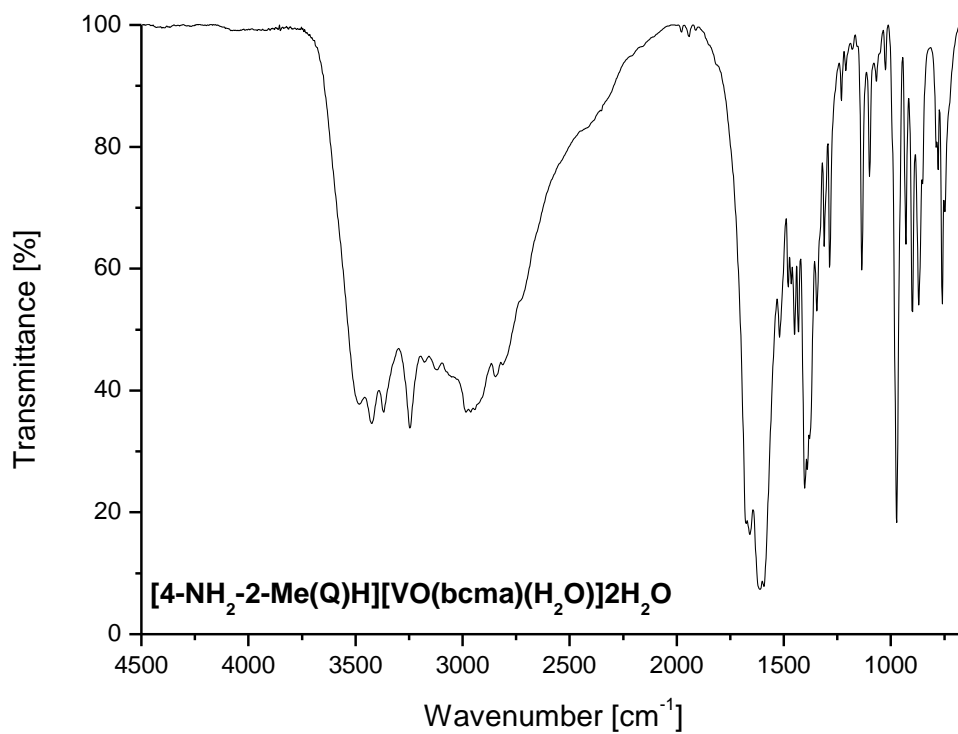

Fig. 1S. The IR spectrum of [4-NH<sub>2</sub>-2-Me(Q)H][VO(bcma)(H<sub>2</sub>O)]2H<sub>2</sub>O.

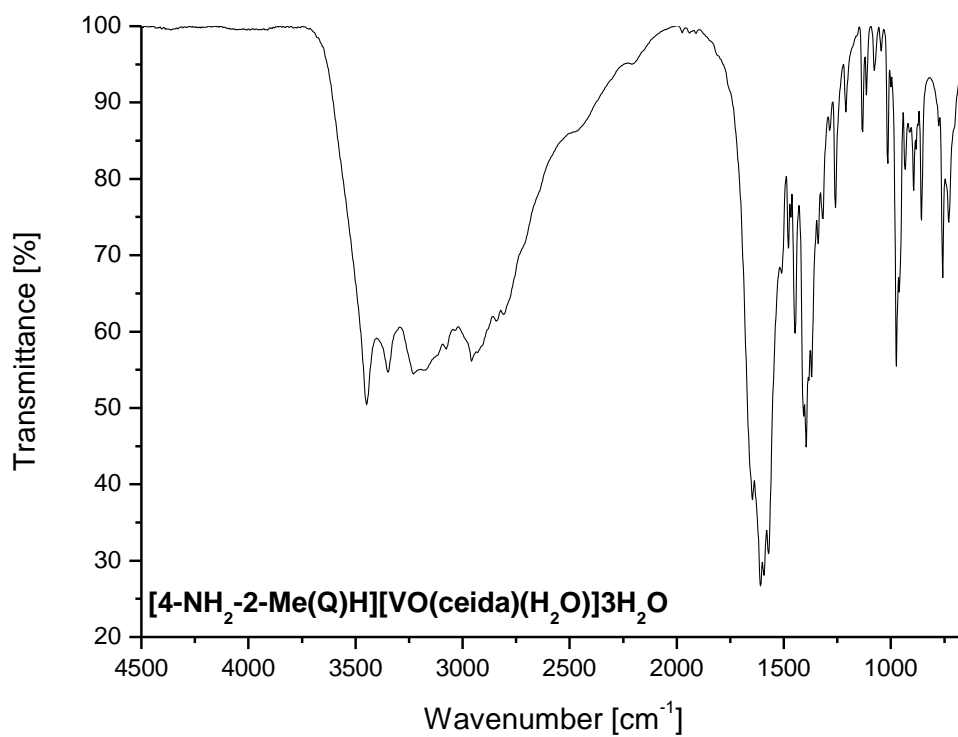

Fig. 2S. The IR spectrum of [4-NH<sub>2</sub>-2-Me(Q)H][VO(ceida)(H<sub>2</sub>O)]3H<sub>2</sub>O.

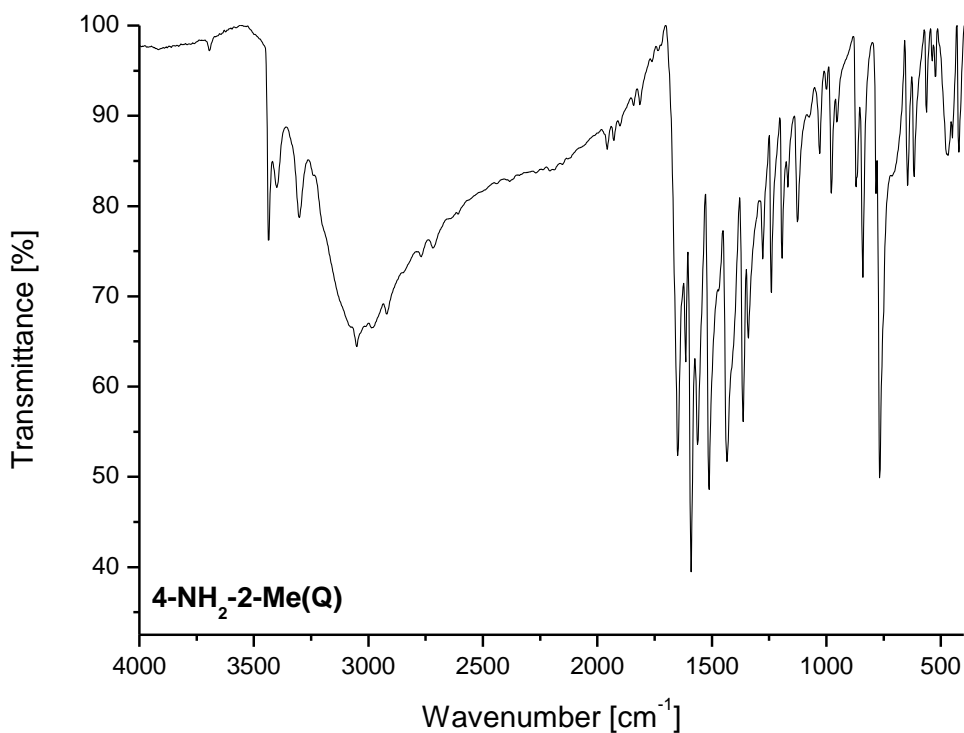

Fig. 3S. The IR spectrum of 4-NH<sub>2</sub>-2-Me(Q).

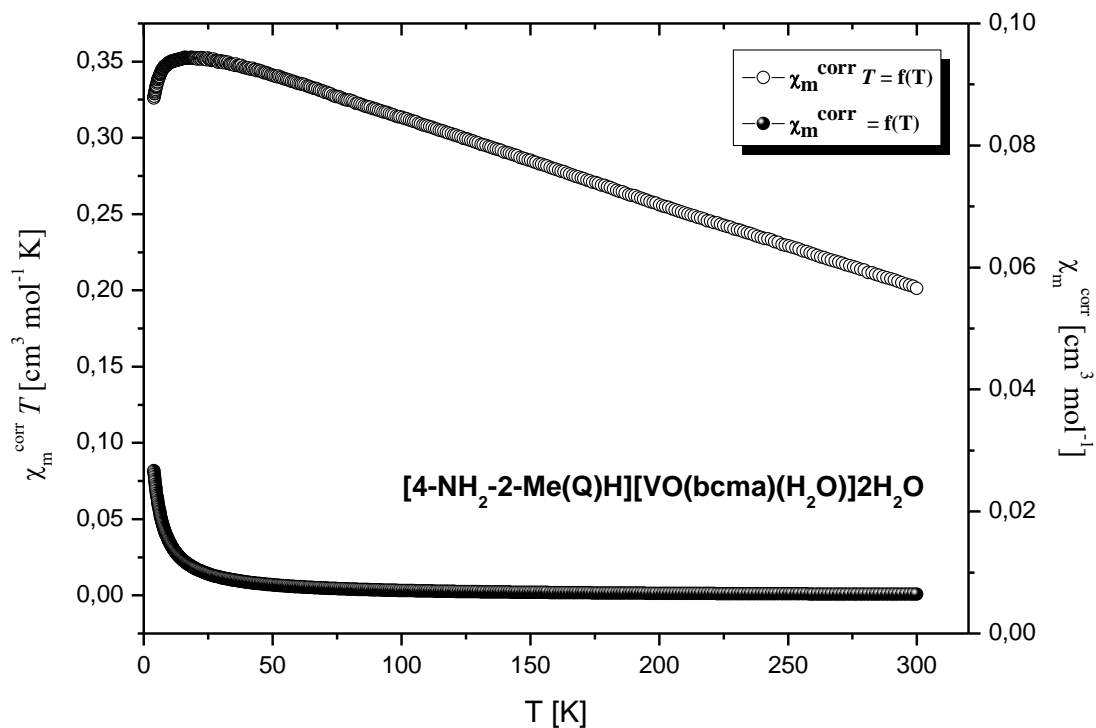

Fig. 4S. The temperature dependence of experimental  $\chi_m T$  and  $\chi_m$  ( $\chi_m$  per one V(IV) ion) for [4-NH<sub>2</sub>-2-Me(Q)H][VO(bcma)(H<sub>2</sub>O)]<sub>2</sub>H<sub>2</sub>O.

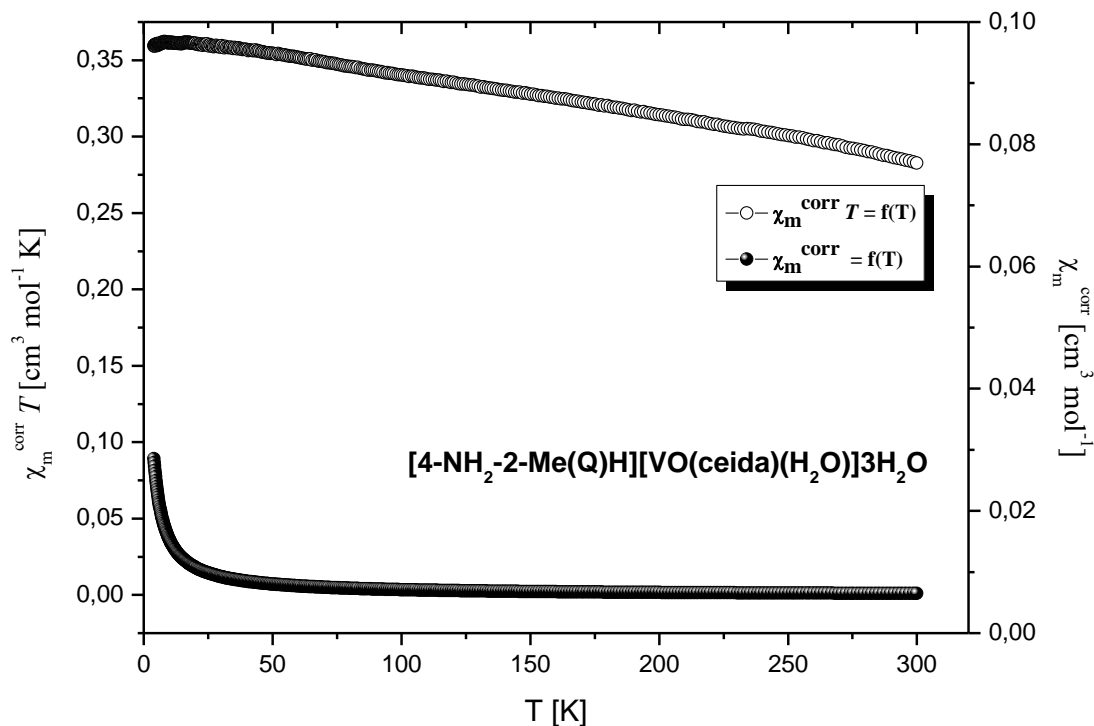

Fig. 5S. The temperature dependence of experimental  $\chi_m T$  and  $\chi_m$  ( $\chi_m$  per one V(IV) ion) for [4-NH<sub>2</sub>-2-Me(Q)H][VO(ceida)(H<sub>2</sub>O)]3H<sub>2</sub>O.

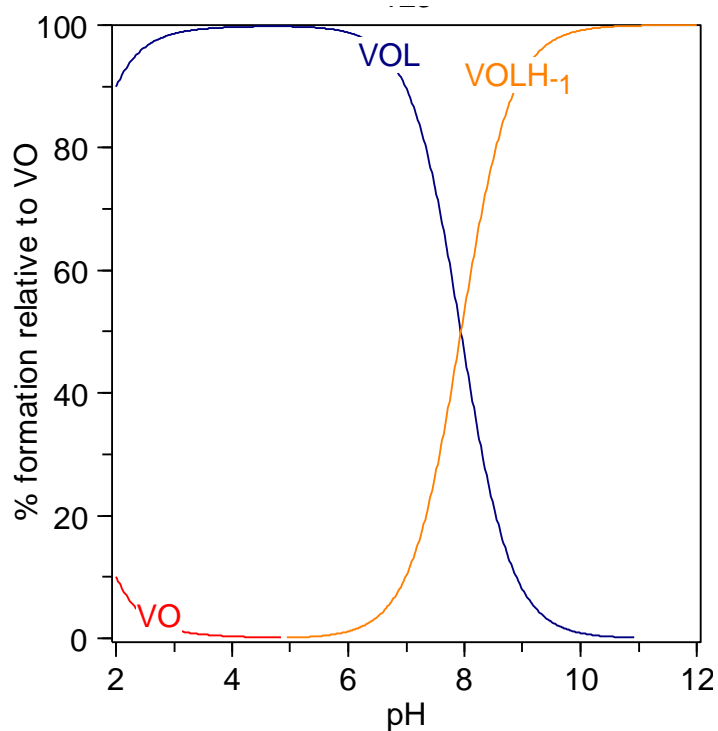

Fig. 6S. Concentration distribution curves of the species presented in the [4-NH<sub>2</sub>-2-Me(Q)H][VO(bcma)(H<sub>2</sub>O)]2H<sub>2</sub>O solution as a function of the pH calculated based on the stability constants listed in Table 1.

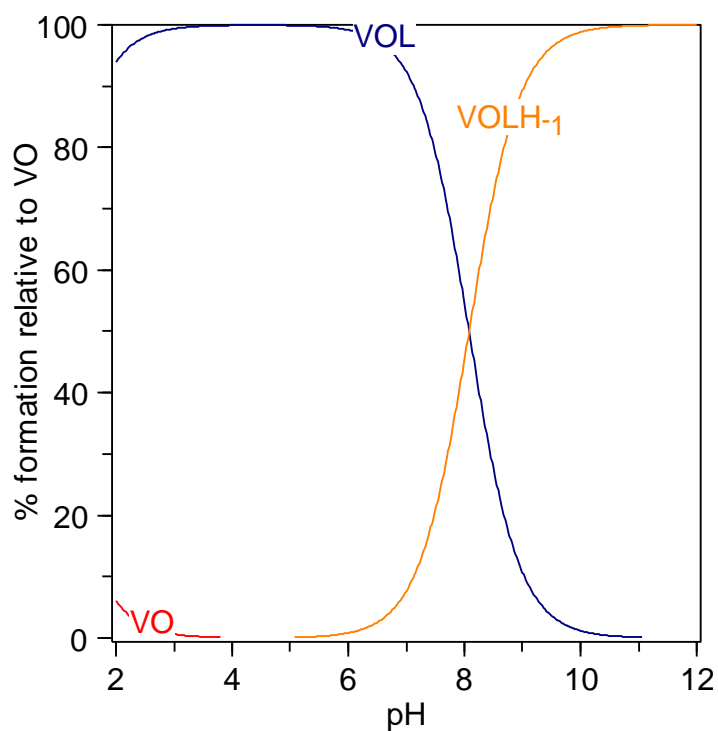

Fig. 7S. Concentration distribution curves of the species presented in the [4-NH<sub>2</sub>-2-Me(Q)H]<sub>2</sub>[VO(pmida)]<sub>3</sub>H<sub>2</sub>O solution as a function of the pH calculated based on the stability constants listed in Table 1.

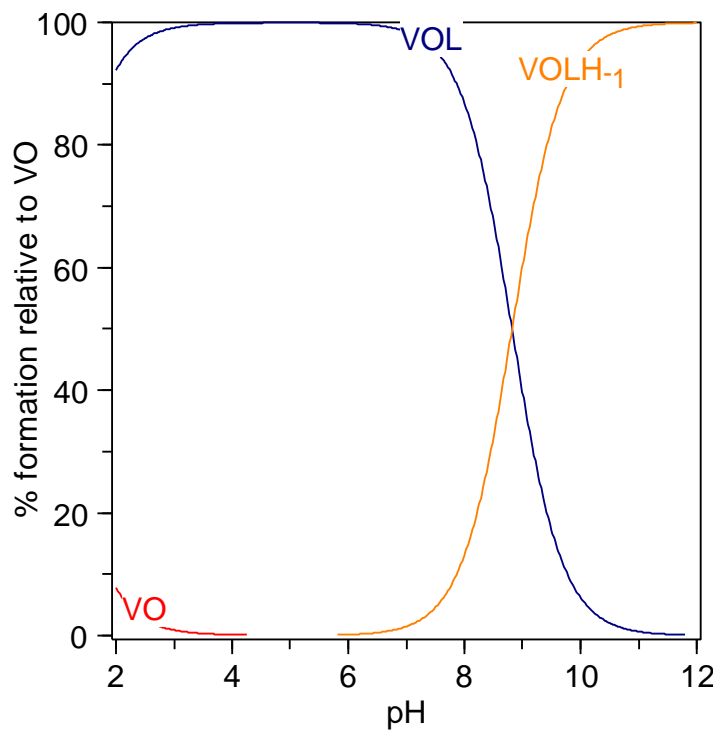

Fig. 8S. Concentration distribution curves of the species presented in the [4-NH<sub>2</sub>-2-Me(Q)H][VO(ceida)(H<sub>2</sub>O)]<sub>3</sub>H<sub>2</sub>O solution as a function of the pH calculated based on the stability constants listed in Table 1.
